# Supplementary material for: The effects of age and dietary restriction on the tissue-specific metabolome of Drosophila
Source: PubMed Central journal article supplement (PMC4568967; doi:10.1111/acel.12358), 2015-06-18

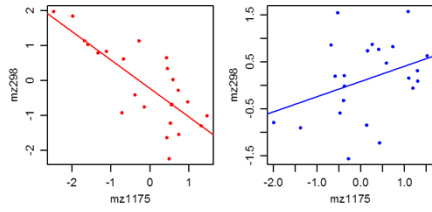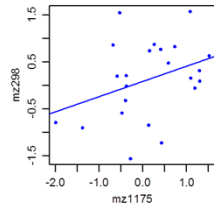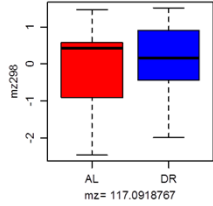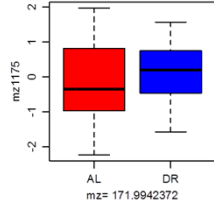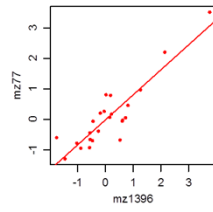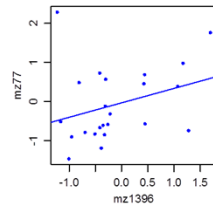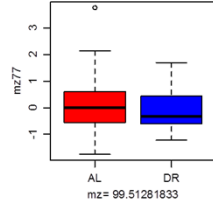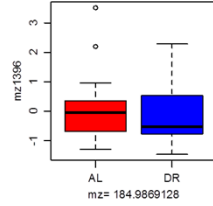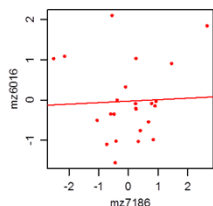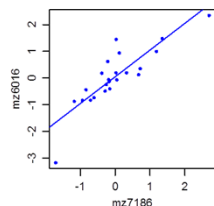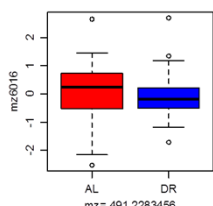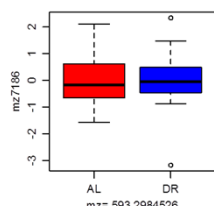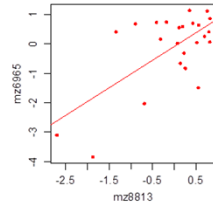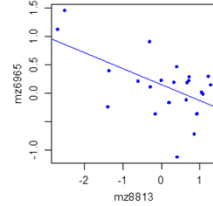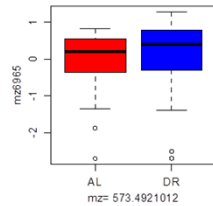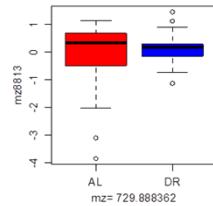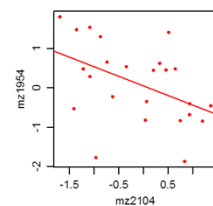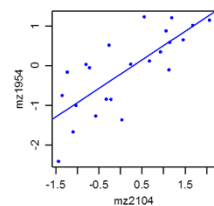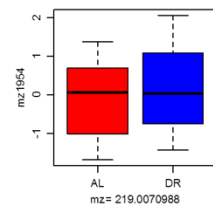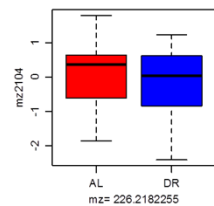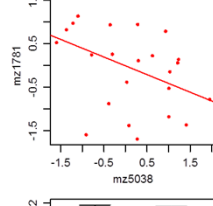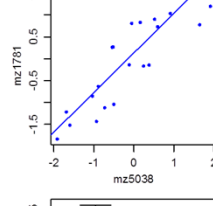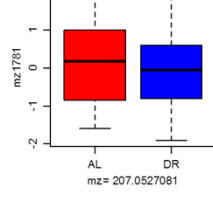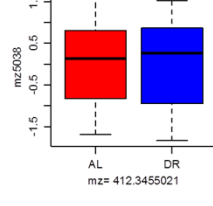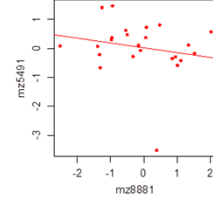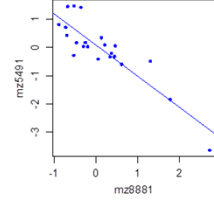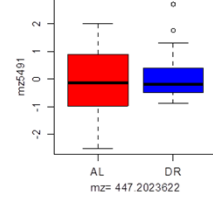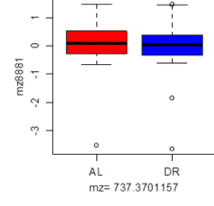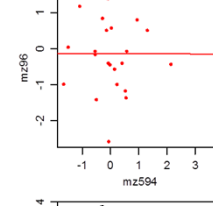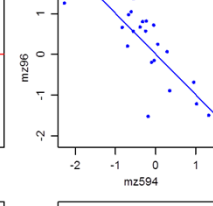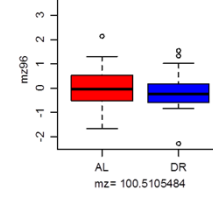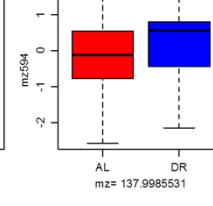

Supplement: acel0014-0797-sd3.pdf [file acel0014-0797-sd3.pdf]
